# Supplementary material for: It’s Tea Time: Interference of Ayahuasca Brew on Discriminative Learning in Zebrafish
Source: PubMed Central journal article supplement (PMC6119691; doi:10.3389/fnbeh.2018.00190), 2018-08-27
Supplement: Image_1.pdf [file Image_1.pdf]

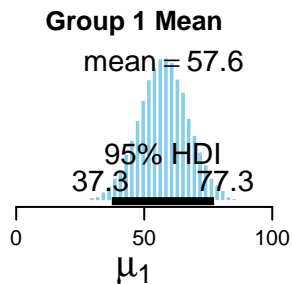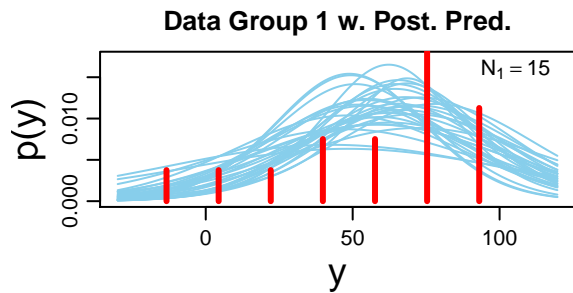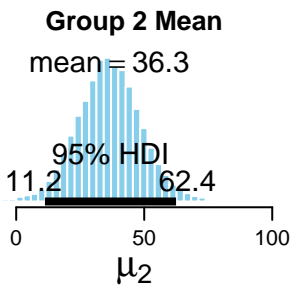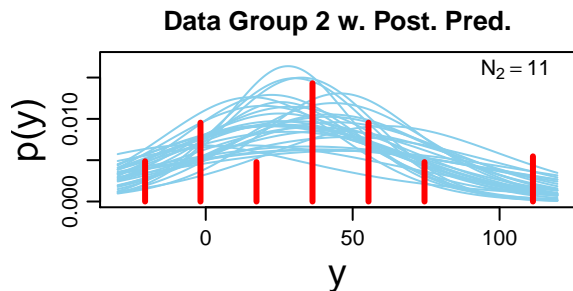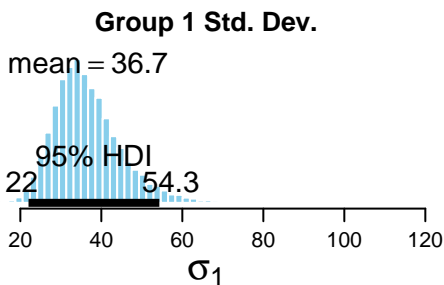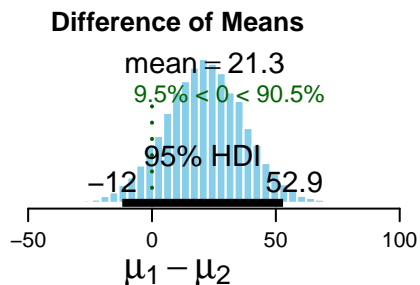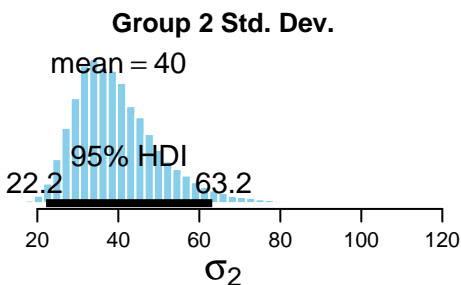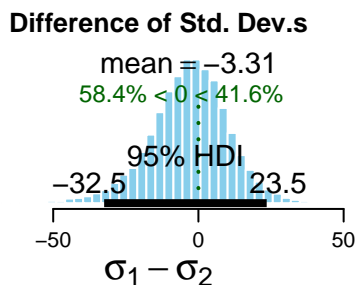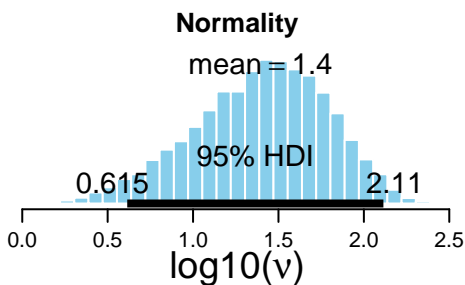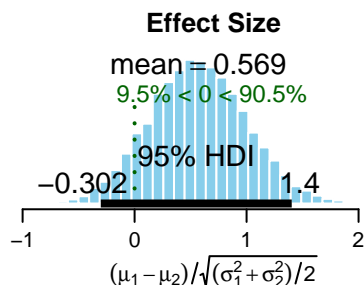

### Group 1 Mean

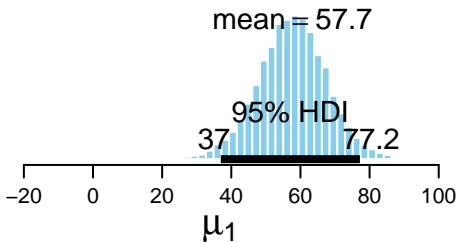

### Data Group 1 w. Post. Pred.

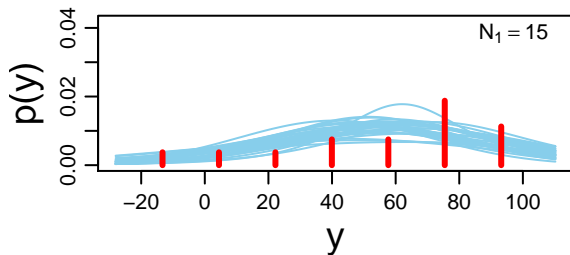

### Group 2 Mean

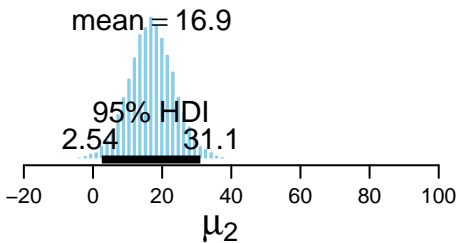

### Data Group 2 w. Post. Pred.

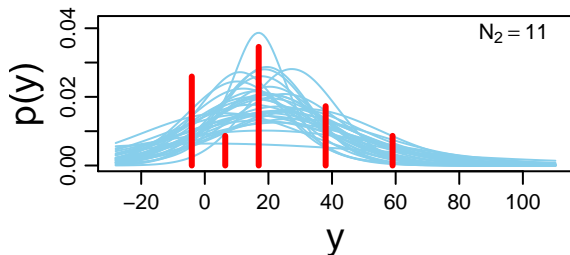

### Group 1 Std. Dev.

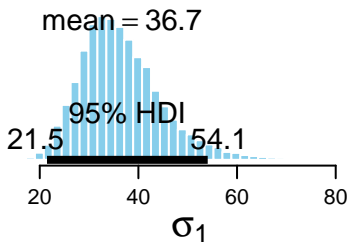

### Difference of Means

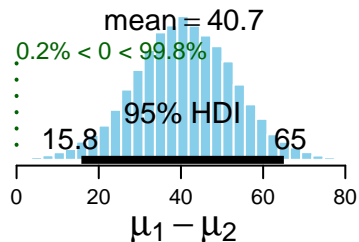

### Group 2 Std. Dev.

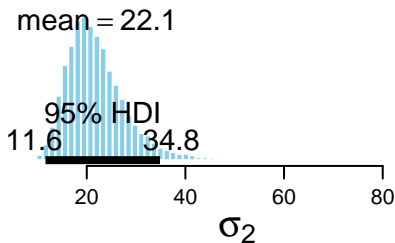

### Difference of Std. Dev.s

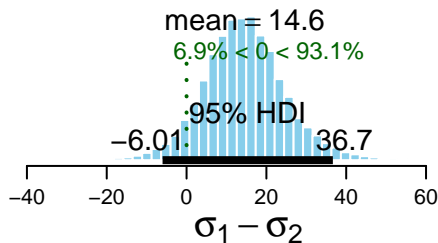

### Normality

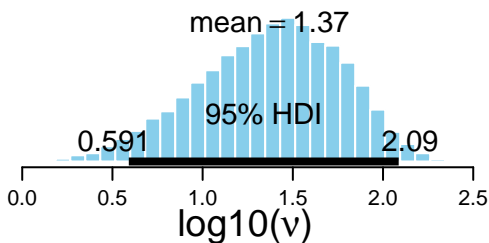

### Effect Size

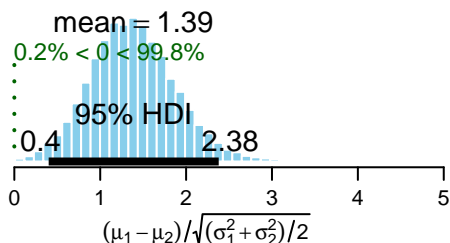

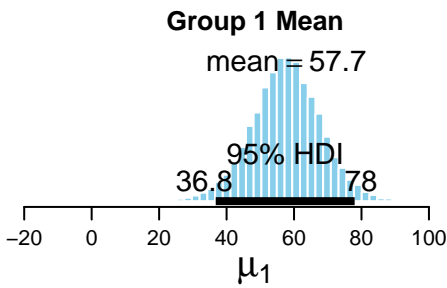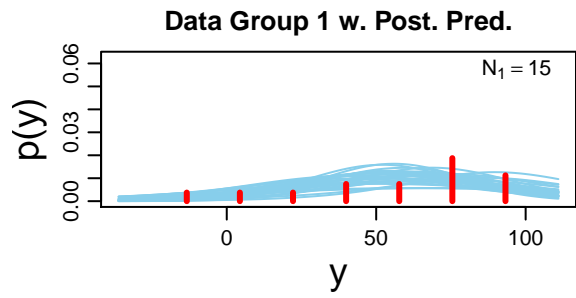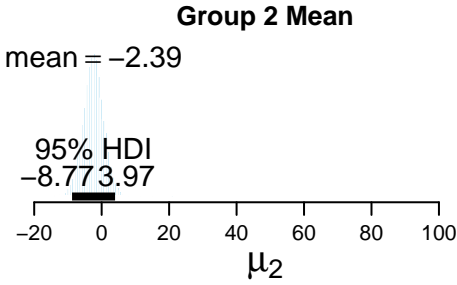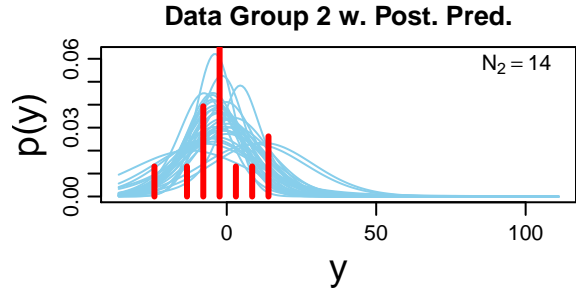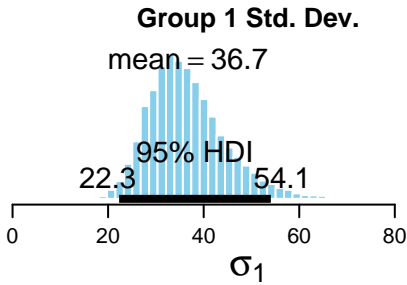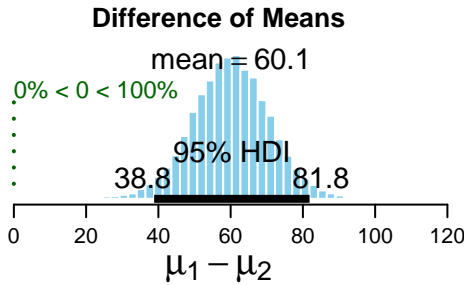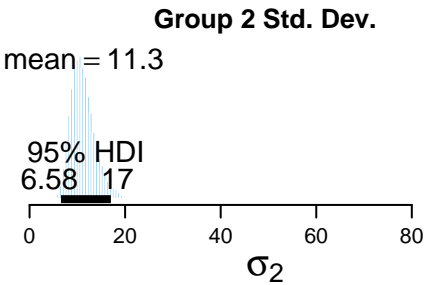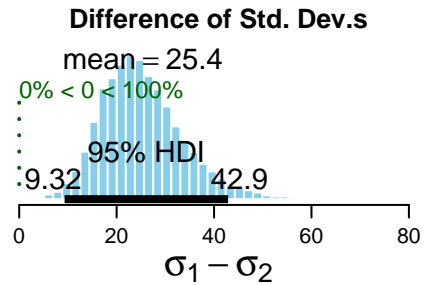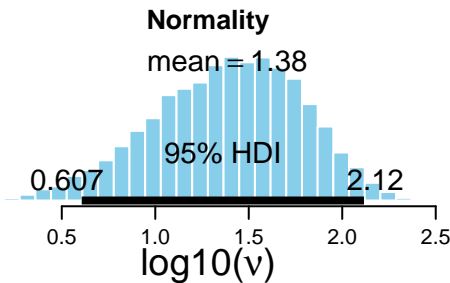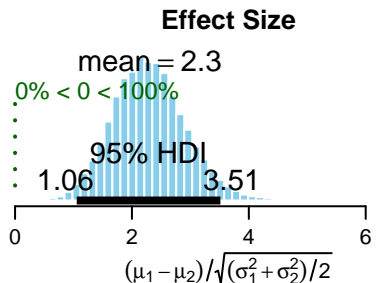

### Group 1 Mean

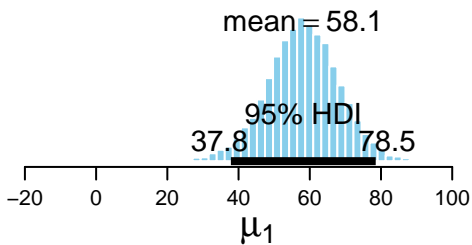

### Data Group 1 w. Post. Pred.

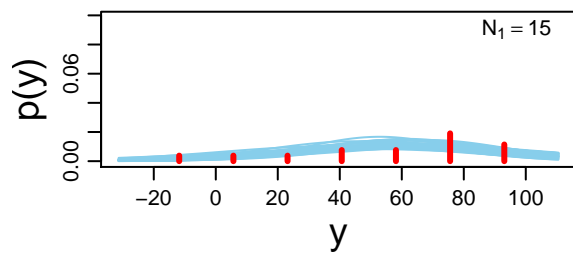

### Group 2 Mean

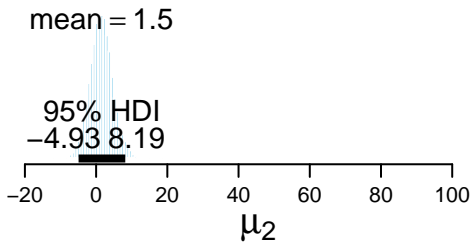

### Data Group 2 w. Post. Pred.

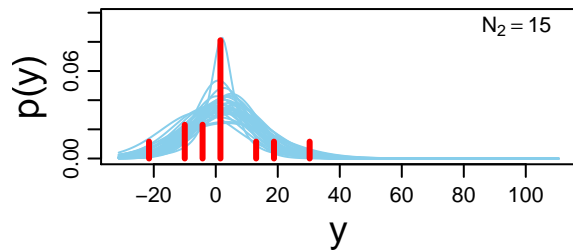

### Group 1 Std. Dev.

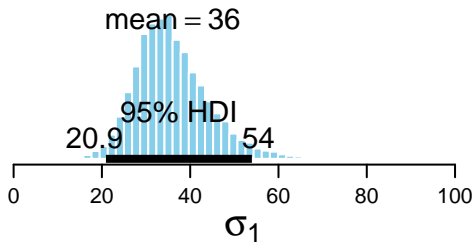

### Difference of Means

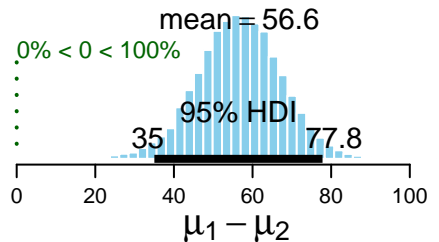

### Group 2 Std. Dev.

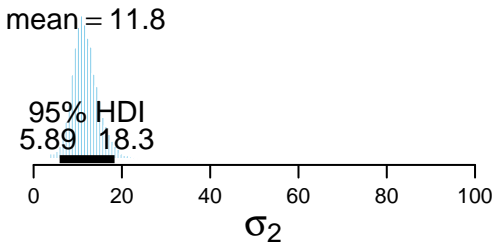

### Difference of Std. Dev.s

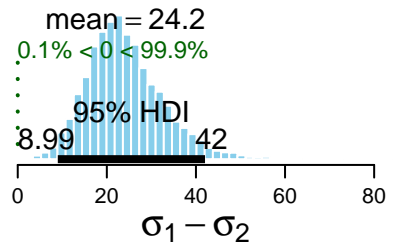

### Normality

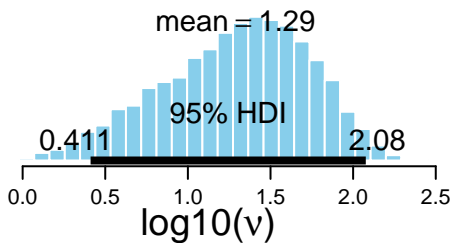

### Effect Size

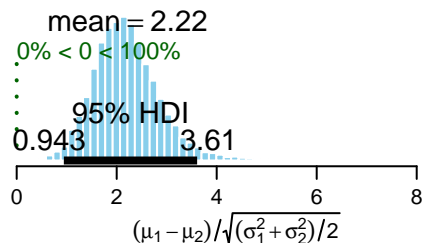

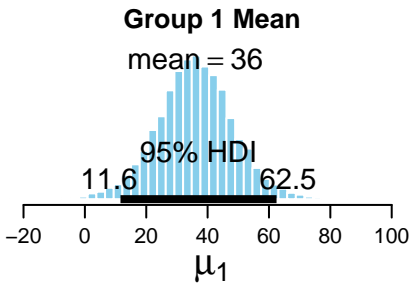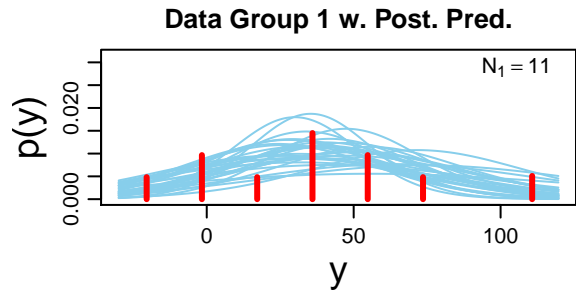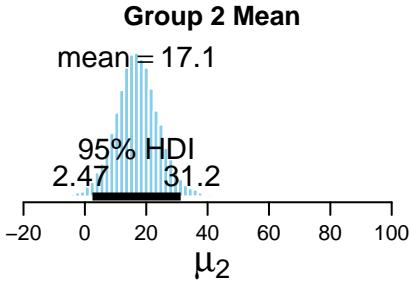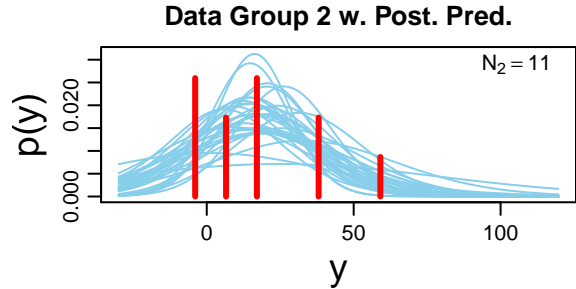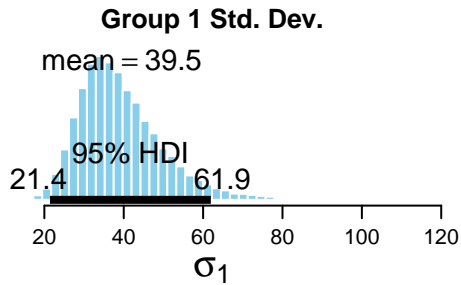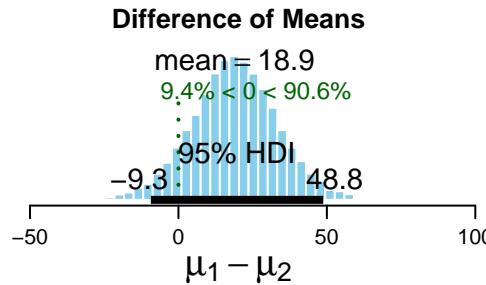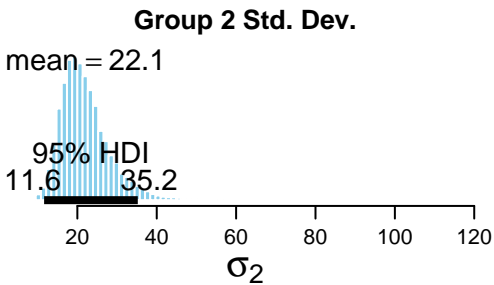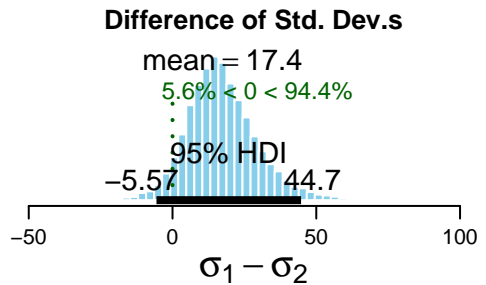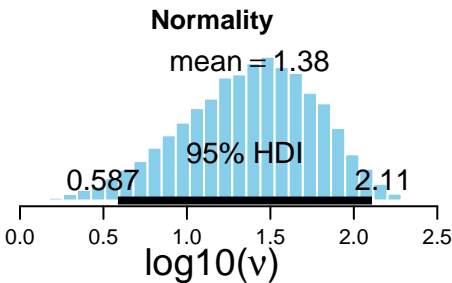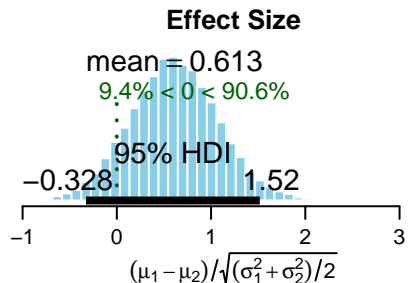

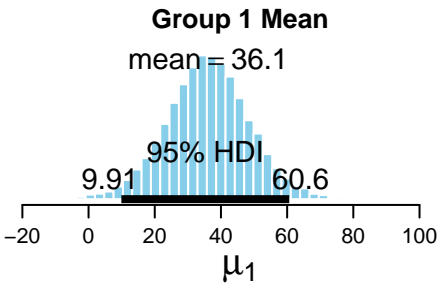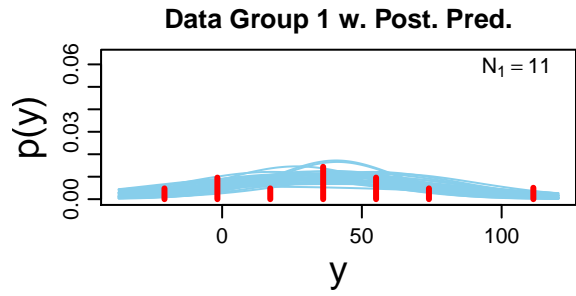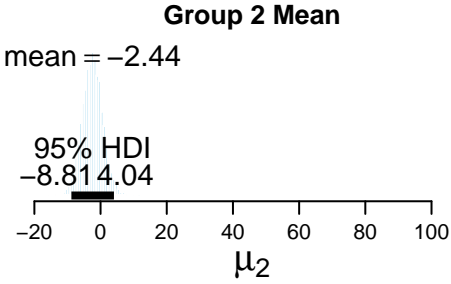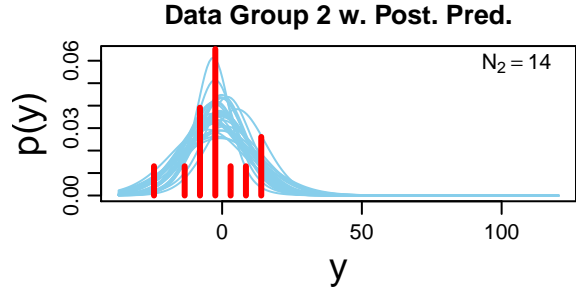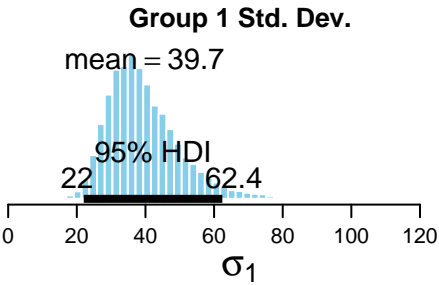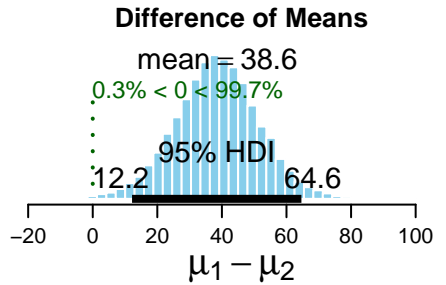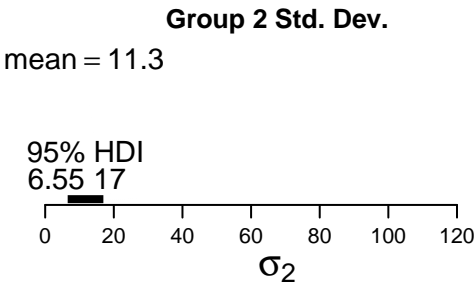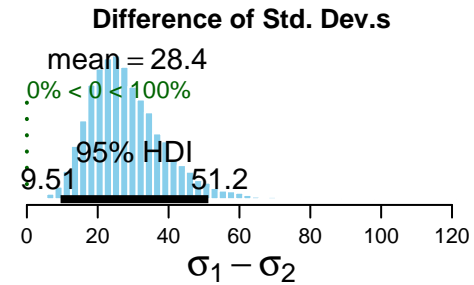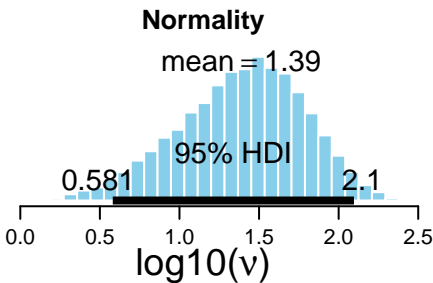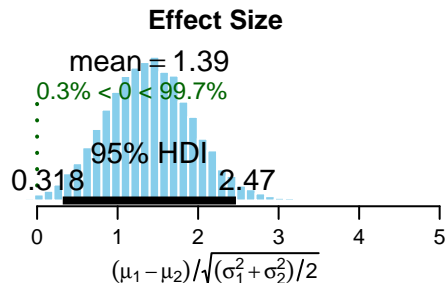

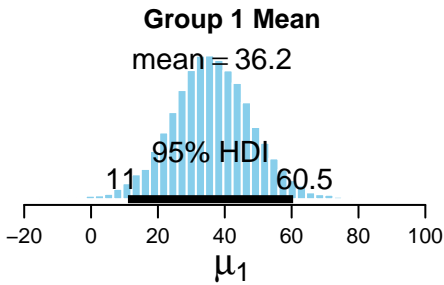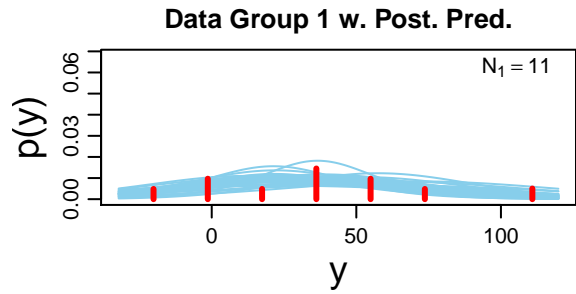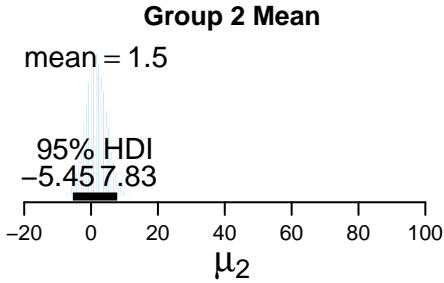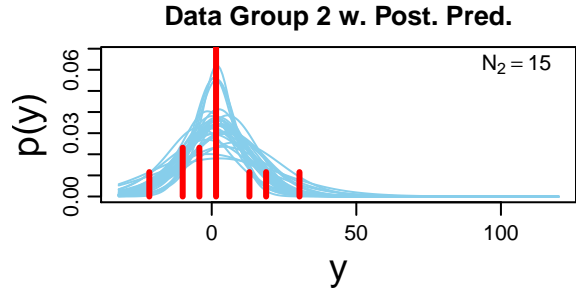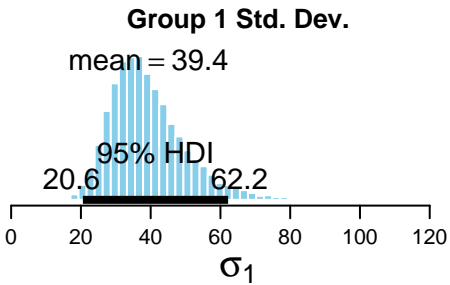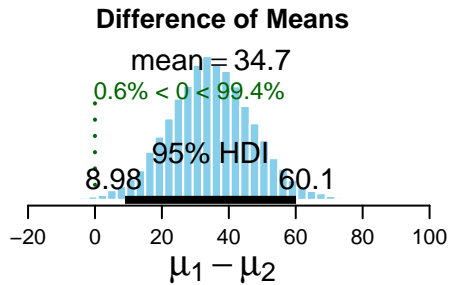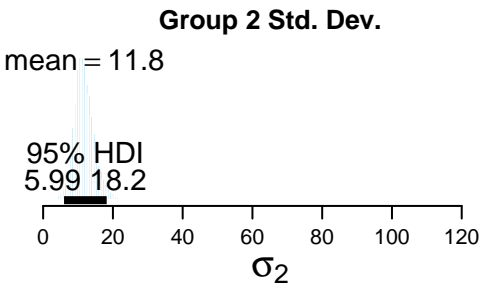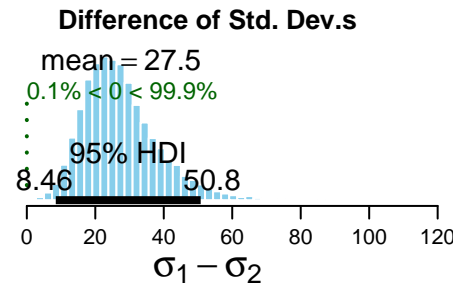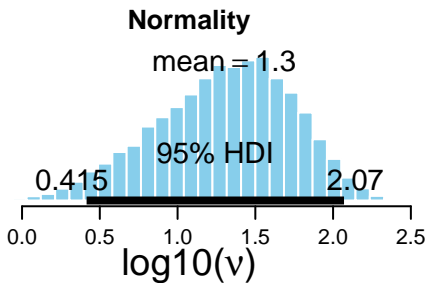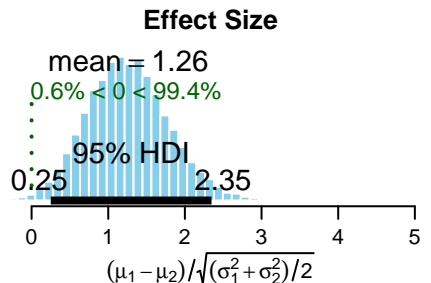

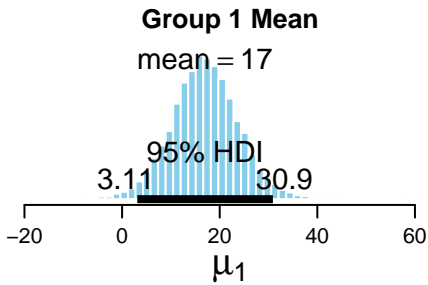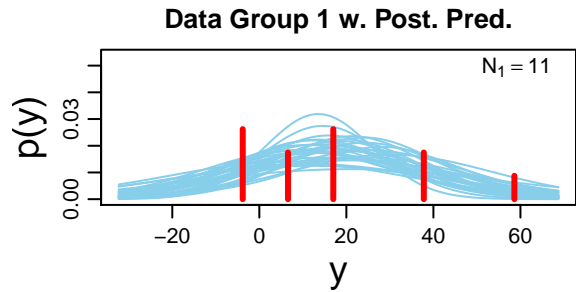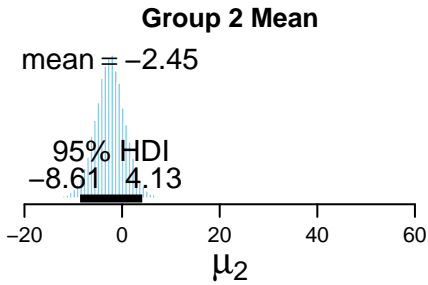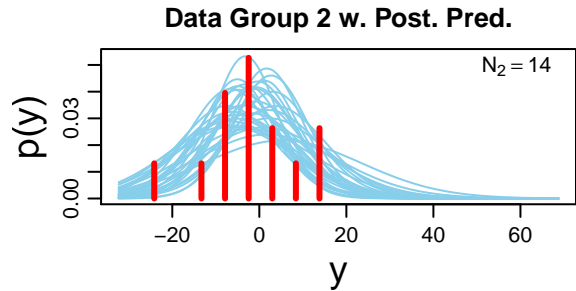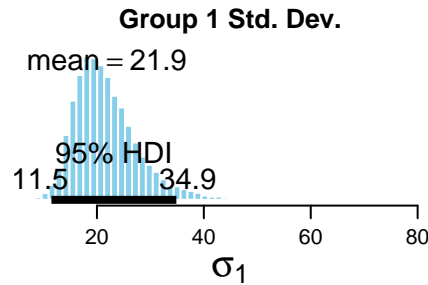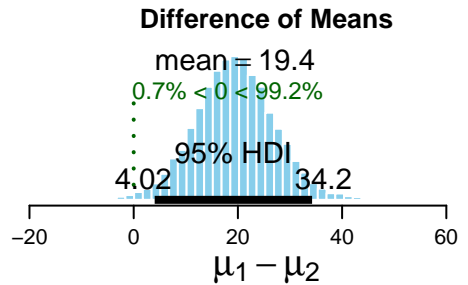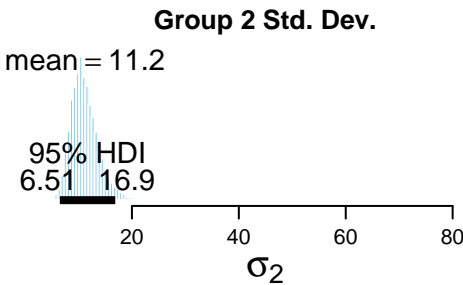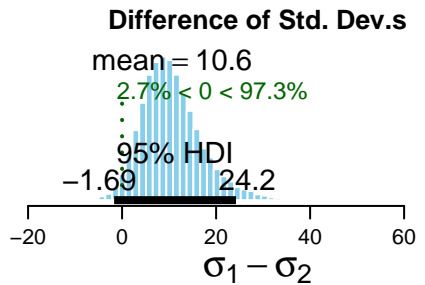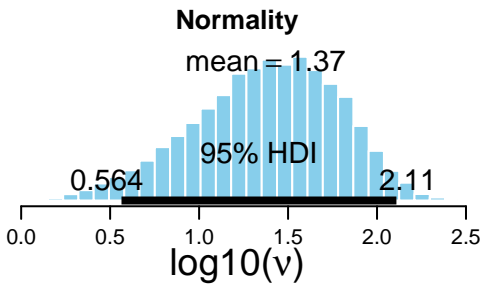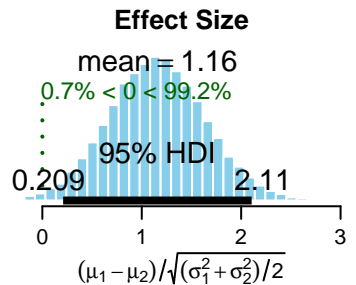



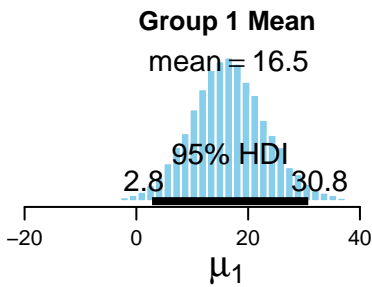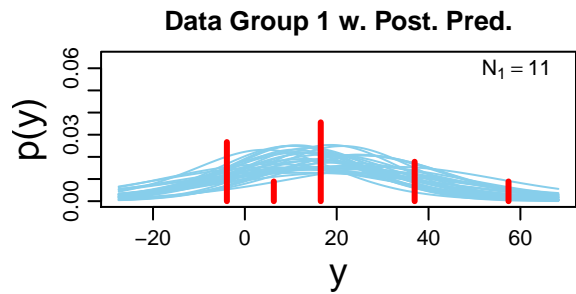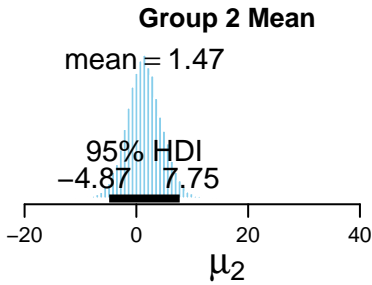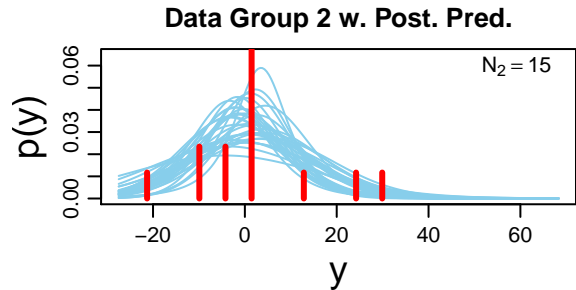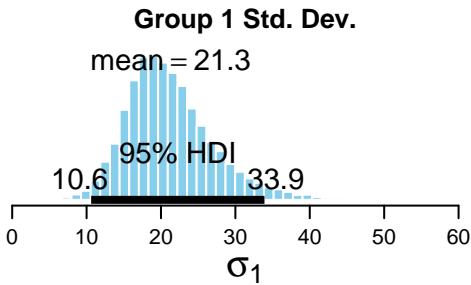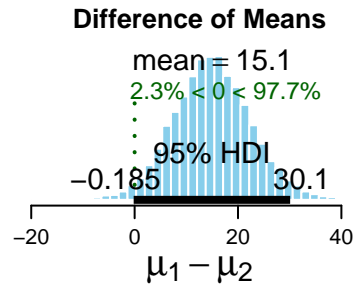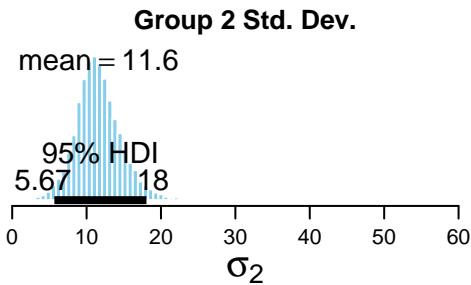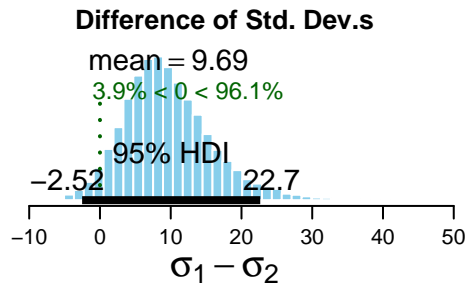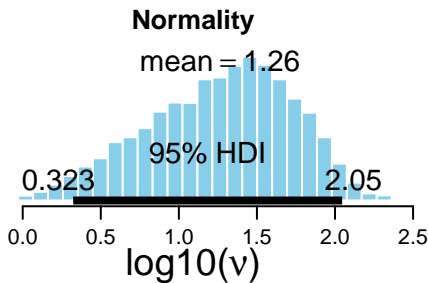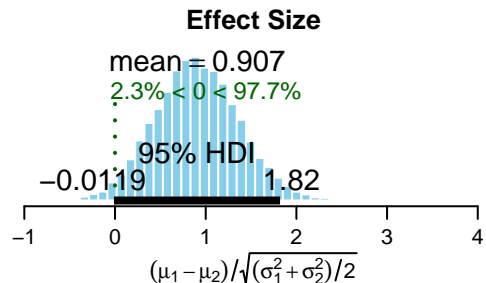

### Group 1 Mean

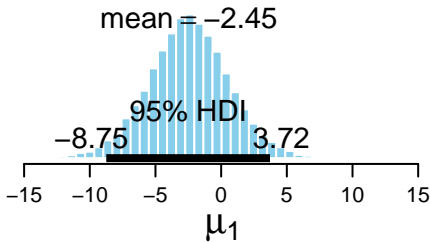

### Data Group 1 w. Post. Pred.

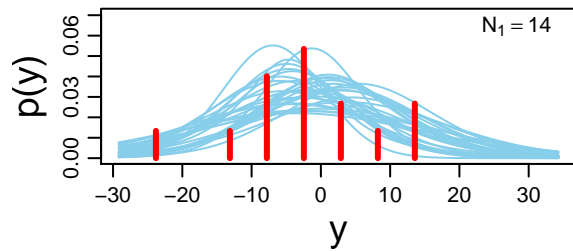

### Group 2 Mean

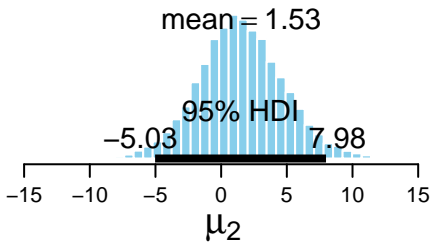

### Data Group 2 w. Post. Pred.

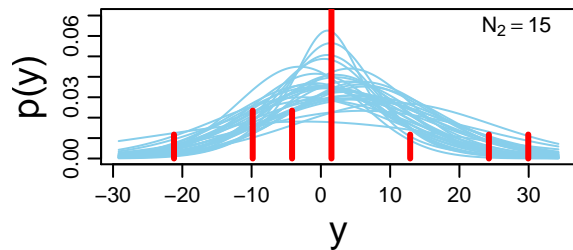

### Group 1 Std. Dev.

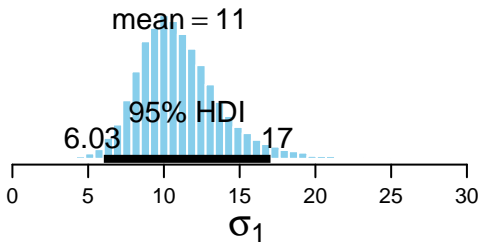

### Difference of Means

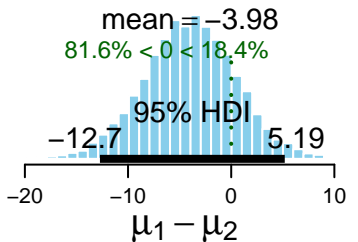

### Group 2 Std. Dev.

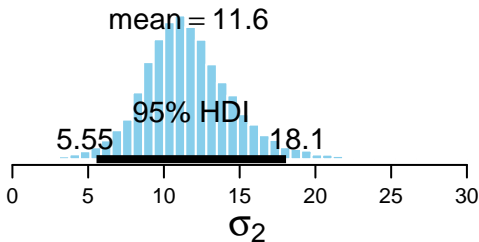

### Difference of Std. Dev.s

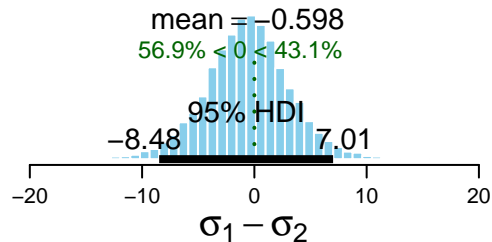

### Normality

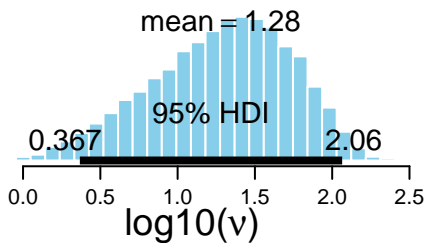

### Effect Size

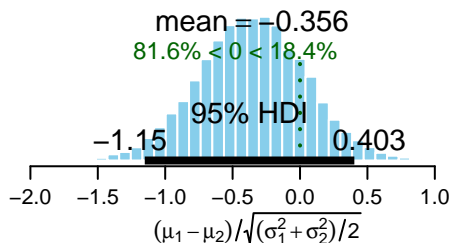

**Supplementary Figure S1.** Bayesian analyses of the discrimination index carried out for paired comparison between groups. Fish were observed for 15 min on day 14 and the time spent near the objects were considered as memorization (object  $A_1$  vs.  $A_2$ ), then fish were observed again for 15 min on the next day and the time spent near the objects were considered exploration ( $A_3$  vs. B). An exploration index was calculated for the memorization phase and a discrimination index for the discrimination phase. On each comparison of a pair of groups, right side exhibits posterior distribution of the Bayesian analysis: comparison between the exploration time of objects  $A_1$  vs.  $A_2$  and  $A_3$  vs. B for the five groups tested. Green dashed lines (central dashed line) indicate the comparison value = 0 and red dashed lines (lateral dashed lines) indicate the ROPE  $\pm 5$ . 95 % HDI interval is marked by the black bar on the floor of the distribution. For further details and statistical analyses, see the Results section.
